# Supplementary material for: Adipocyte β-arrestin-2 is essential for maintaining whole body glucose and energy homeostasis
Source: PubMed Central journal article supplement (PMC6610117; doi:10.1038/s41467-019-11003-4), 2019-07-03
Supplement: 41467_2019_11003_MOESM1_ESM.pdf [file 41467_2019_11003_MOESM1_ESM.pdf]

## **Supplementary Information**

### **Adipocyte $\beta$ -arrestin-2 is essential for maintaining whole body glucose and energy homeostasis**

Pydi et al.

#### **Table of contents**

Supplementary Figures 1 – 14

Supplementary Tables 1 – 3

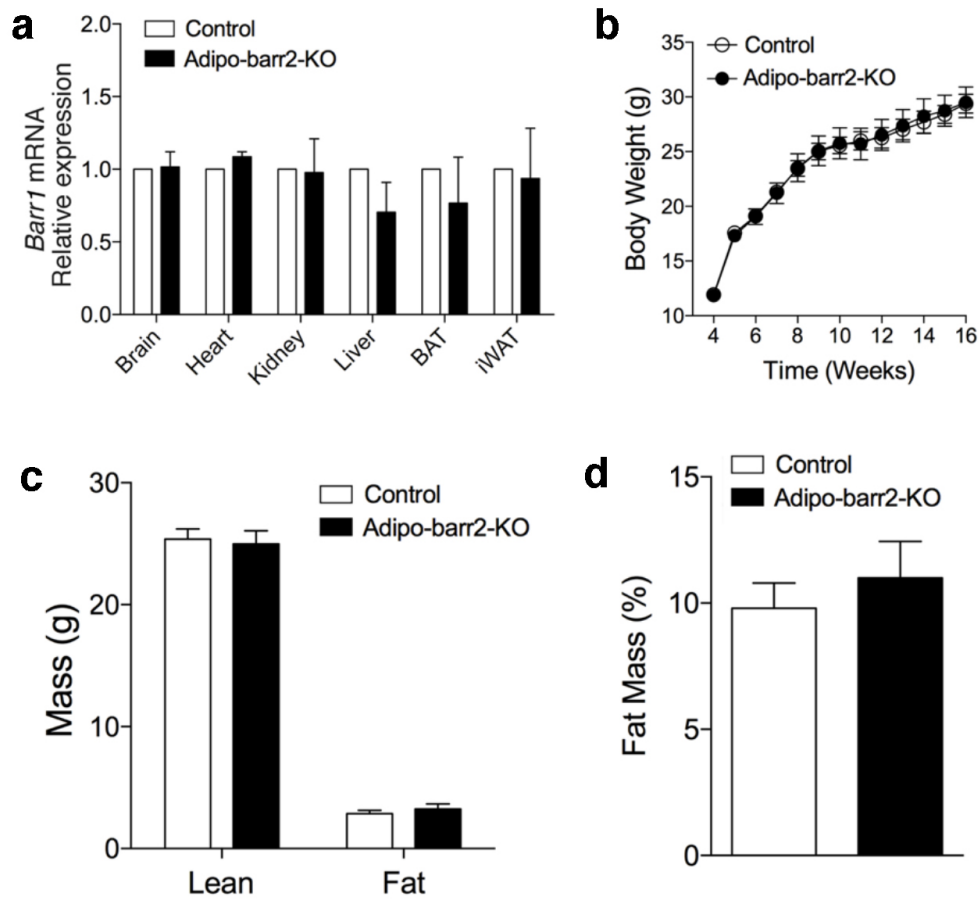

**Supplementary Figure 1.** Adipo-barr2-KO mice consuming regular chow do not show any changes in *barr1* expression, body weight, and body composition. **(a)** Expression of *barr1* mRNA in different tissues of adipo-barr2-KO mice and control mice maintained on regular chow (mouse age: 8-9 weeks; n=3 per group.) *Barr1* expression data are normalized relative to the expression of  $\beta$ -actin. **(b)** Body weight gain of control and adipo-barr2-KO mice consuming regular chow (n=7-9 per group). **(c, d)** Body composition **(c)** and fat mass (% of body weight) **(d)** of mice maintained on regular chow for 12 weeks (n=7-9 per group).

All data are expressed as means  $\pm$  s.e.m. Male mice maintained on regular chow were used for all experiments.

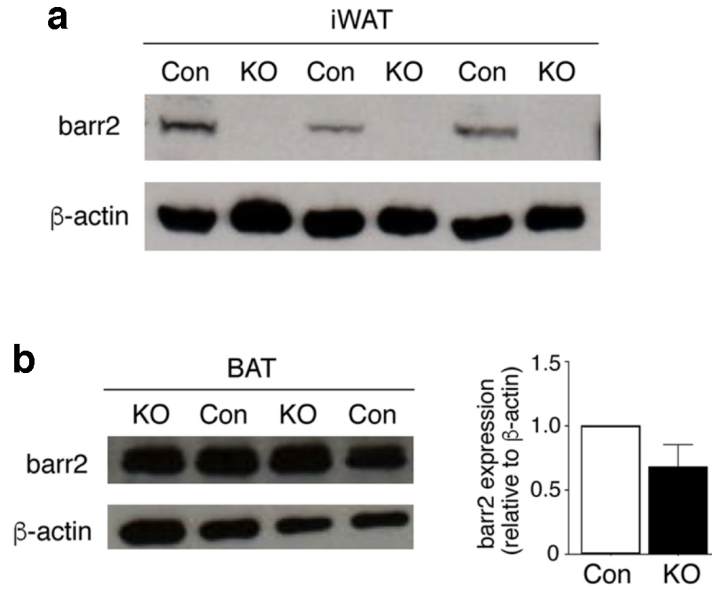

**Supplementary Figure 2.** Western blotting analysis of barr2 expression in iWAT and BAT of control and adipo-barr2-KO mice. **(a)** Barr2 protein is undetectable in iWAT from adipo-barr2-KO mice (KO; Con=control mice). **(b)** Barr2 protein expression levels in BAT from adipo-barr2-KO mice are not significantly reduced, as compared to control mice (n=3).

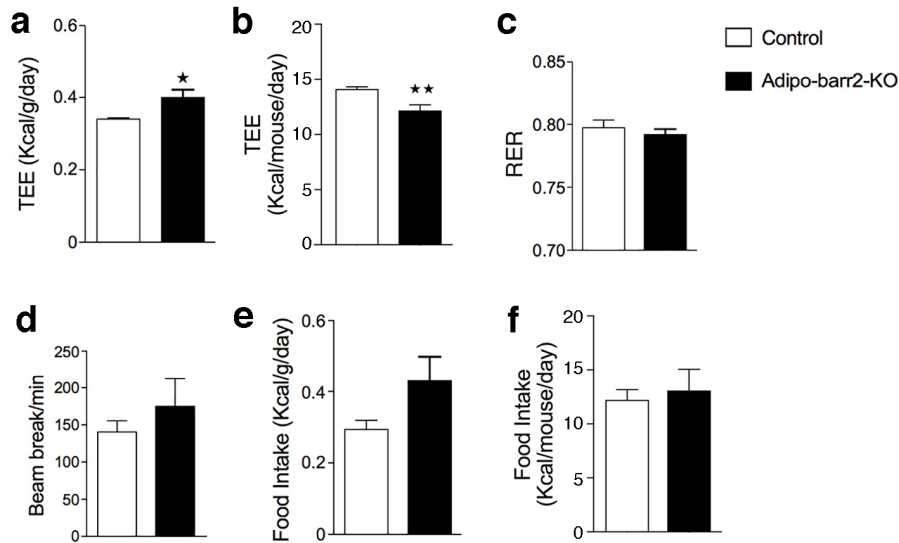

**Supplementary Figure 3.** Indirect calorimetry studies with control and adipo-barr2-KO mice maintained on a HFD for 8 weeks. **(a)** Total energy expenditure (TEE) normalized to body weight. **(b)** TEE per mouse. **(c)** Respiratory exchange ratio (RER). **(d)** Ambulatory activity. **(e)** Food intake normalized to body weight. **(f)** Food intake per mouse. Mice were 12 weeks old at the time of testing. Measurements were carried out using the Oxymax/CLAMS system (n=6 male mice per group). Data are expressed as means ± s.e.m. \*p<0.05; \*\*p<0.01 (two-tailed Student's t-test).

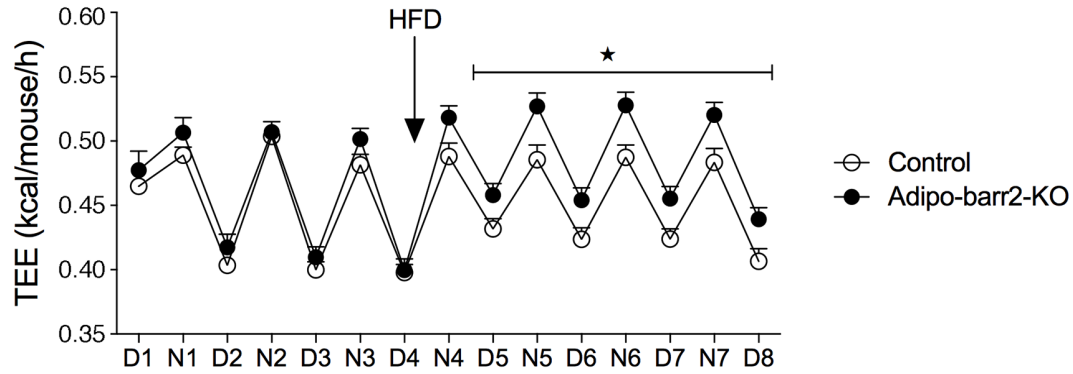

**Supplementary Figure 4.** Adipo-barr2-KO mice show increased total energy expenditure (TEE) after being switched to a HFD. TEE was first monitored for 3 days in 6-7-week-old mice consuming regular chow (days 1-3; D1/N1 to D3/N3), followed by TEE monitoring after switching the mice to a HFD (days 4-8; D4/N4 to D8/N8). Measurements were carried out using the Oxymax/CLAMS system. Data are expressed as means  $\pm$  s.e.m (n=12 male mice per group). \*p<0.05; D=day; N=night.

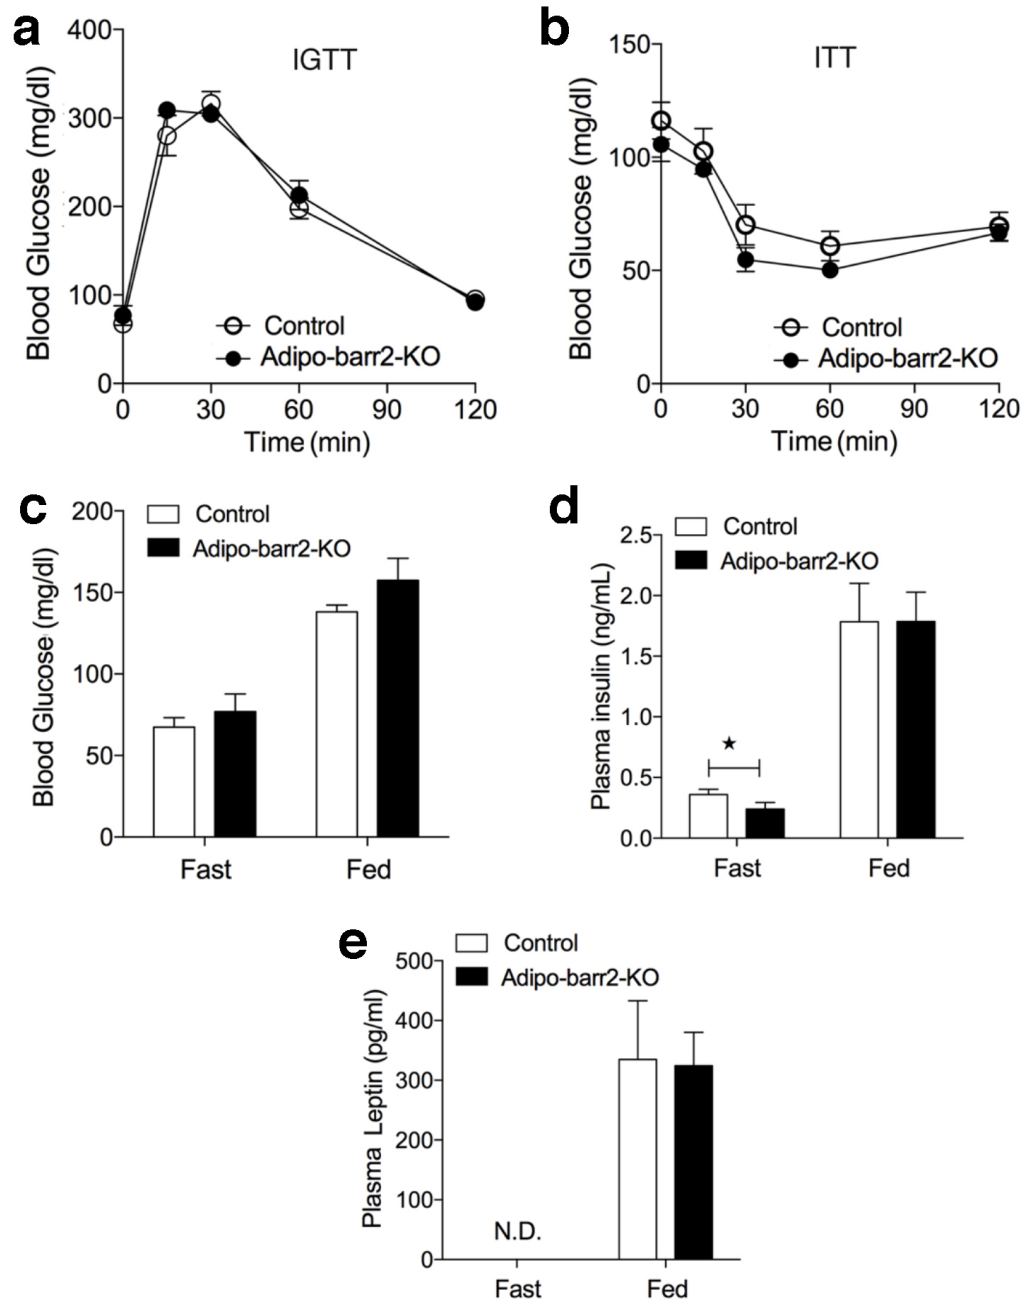

**Supplementary Figure 5.** Adipo-barr2-KO mice consuming regular chow do not show any major changes in glucose tolerance, insulin sensitivity, and other metabolic parameters.

(a, b) In vivo metabolic tests. Control and adipo-barr2-KO mice consuming regular chow were subjected to i.p. glucose tolerance (1 g glucose/kg; IGTT) (a) and insulin tolerance tests (1 U insulin/kg i.p.; ITT) (b) (n=7-9/group). (c-e) Fed and fasting blood glucose (c), plasma insulin (d), and plasma leptin (e) levels (n=7-10/group).

Data are given as means  $\pm$  s.e.m. For all experiments, male mice were used (mouse age: 8-10 weeks). \*p<0.05 (two-tailed Student's t-test). N.D., not determined

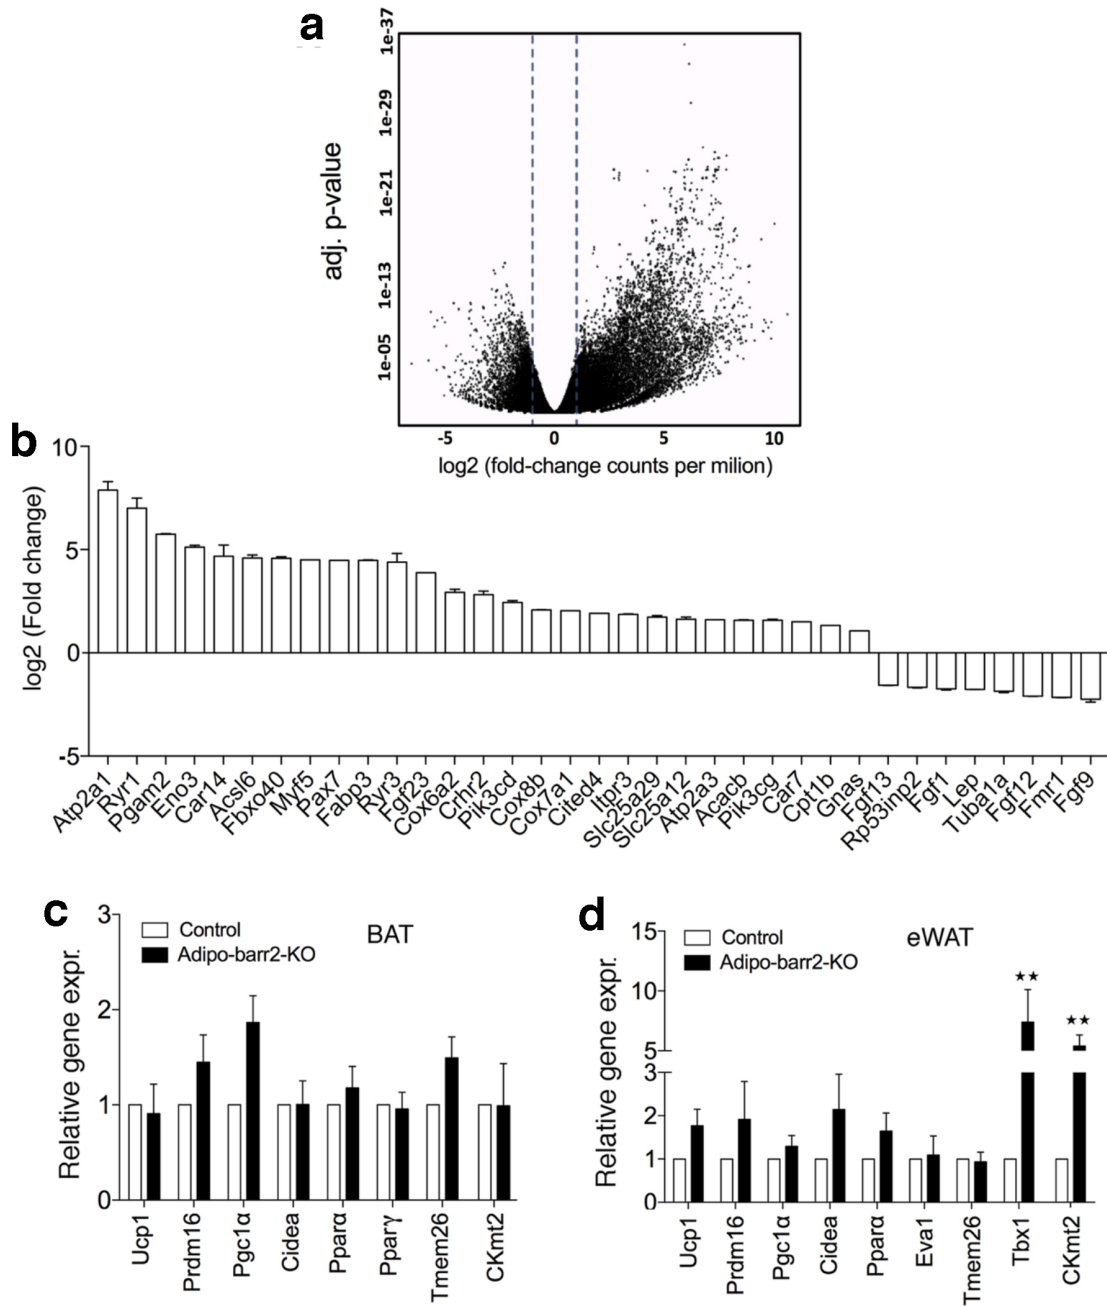

**Supplementary Figure 6.** Gene expression analysis using RNA from iWAT, eWAT, and BAT of HFD adipo-barr2-KO and control mice. **(a)** Volcano plot representing differentially expressed genes in iWAT of adipo-barr2-KO vs control mice, as studied via RNA-seq (n=6 per group). **(b)** Bar graph representing differences in transcript levels of key regulatory genes involved in thermogenesis, mitochondrial function, and lipid metabolism, as determined via RNA-seq. **(c, d)** Expression levels of thermogenic marker genes in BAT (c) and eWAT (d) of adipo-barr2-KO mice and control littermates, as determined by qRT-PCR. RNA was obtained from male mice that had been maintained on a HFD for 8 weeks. Data are given as means  $\pm$  s.e.m. (n=4 per group). \*\*p<0.01 (two-tailed Student's t-test).

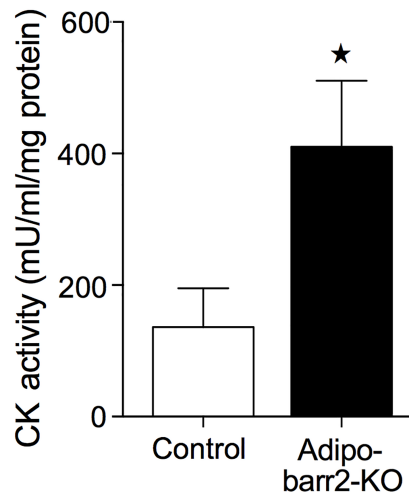

**Supplementary Figure 7.** Creatine kinase activity is enhanced in mitochondria from iWAT of adipo-barr2-KO mice. Male HFD adipo-barr2-KO mice and their control littermates were exposed to 4 °C for one week (n=3 per group). CK assays were carried out using mitochondria from iWAT of adipo-barr2-KO and control mice. Data are given as means  $\pm$  s.e.m. \* $p < 0.05$  (two-tailed Student's t-test).

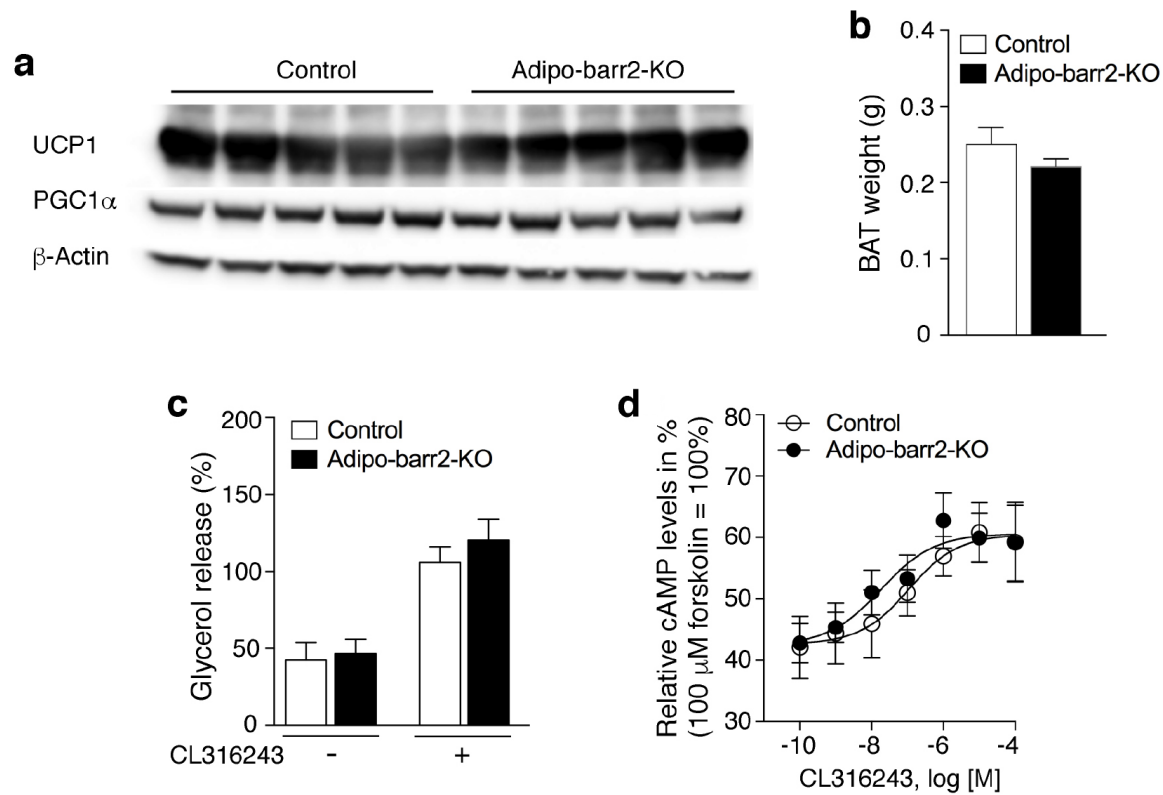

**Supplementary Figure 8.** Studies with BAT and BAT cells derived from adipo-barr2-KO and control mice. **(a)** Western blot analysis of UCP1 and PGC1 $\alpha$  expression in BAT of HFD control and adipo-barr2-KO mice (n=5 per group). **(b)** BAT weight of HFD control and adipo-barr2-KO mice (n=6 per group). **(c)** CL316243 (1  $\mu$ M) stimulates lipolysis in mature BAT cells prepared from mutant and control mice to a similar extent (n=3 per group). **(d)** CL316243 treatment causes comparable increases in cAMP levels in mature BAT cells prepared from mutant and control mice (n=3 per group). For all experiments, male mice were used. Both groups of mice were maintained on the HFD for 8 weeks. Data are presented as means  $\pm$  s.e.m.



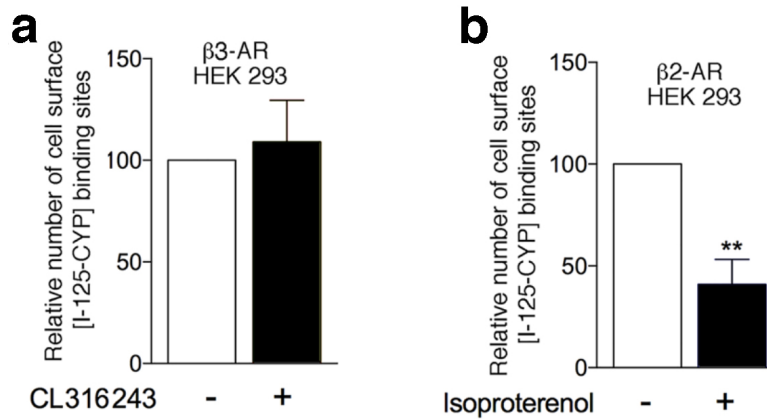

**Supplementary Figure 9.**  $\beta$ -AR internalization studies carried out with transfected HEK 293 cells. **(a)** In  $\beta$ 3-AR-expressing HEK 293 cells, CL316243 (1  $\mu$ M for 30 min) treatment does not cause  $\beta$ 3-AR internalization. **(b)** In  $\beta$ 2-AR-expressing HEK 293 cells, isoproterenol (10  $\mu$ M for 30 min) treatment strongly promotes  $\beta$ 2-AR internalization. Cell surface  $\beta$ -AR levels were determined in [ $I^{125}$ ]CYP binding assays (see Methods for details). Data are given as means  $\pm$  s.e.m. (n=4). \*\*p<0.01 (two-tailed Student's t-test).

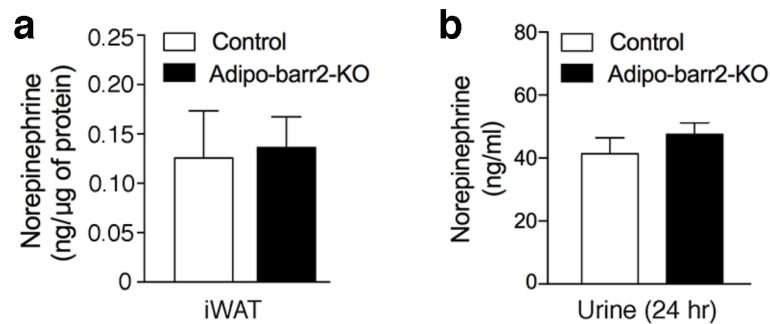

**Supplementary Figure 10.** HFD adipo-barr2-KO mice and control mice show similar norepinephrine levels in iWAT and urine. **(a, b)** Norepinephrine levels in iWAT (a) and in 24 hr urine (b) collected from male mice fed with a HFD for 12 weeks. Data are given as means  $\pm$  s.e.m. (n=4-7 per group).

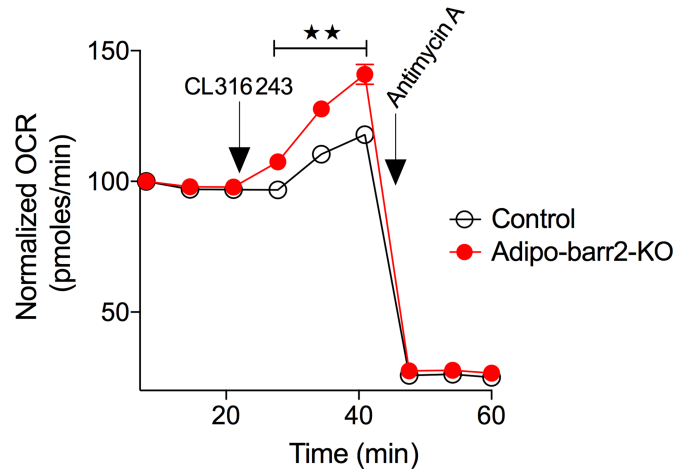

**Supplementary Figure 11.** Effect of CL316243 on oxygen consumption rate (OCR) of differentiated adipocytes from iWAT of control and barr2 mutant mice. CL316243 (1  $\mu$ M) enhances OCR of differentiated adipocytes derived from iWAT lacking barr2, as compared to control adipocytes (n=3 per group). \*\*p<0.01.

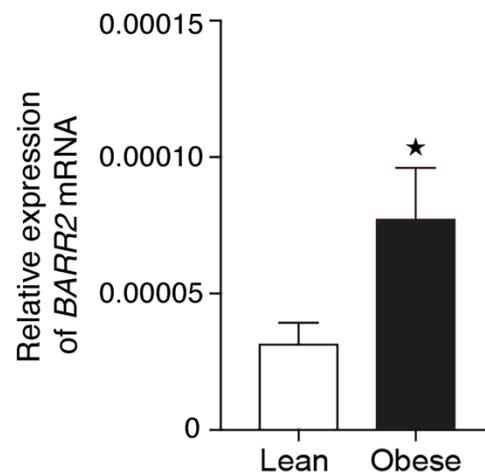

**Supplementary Figure 12.** *BARR2* mRNA levels are significantly increased in subcutaneous fat from obese human individuals. Relative mRNA expression of *BARR2* in subcutaneous fat from lean and obese human individuals were determined via qRT-PCR. Data were normalized relative to the expression of 18-S RNA. Data represent means  $\pm$  s.e.m. (n=8 per group). \*p<0.05 (two-tailed Student's t-test).

Uncropped gels for Figure 3D

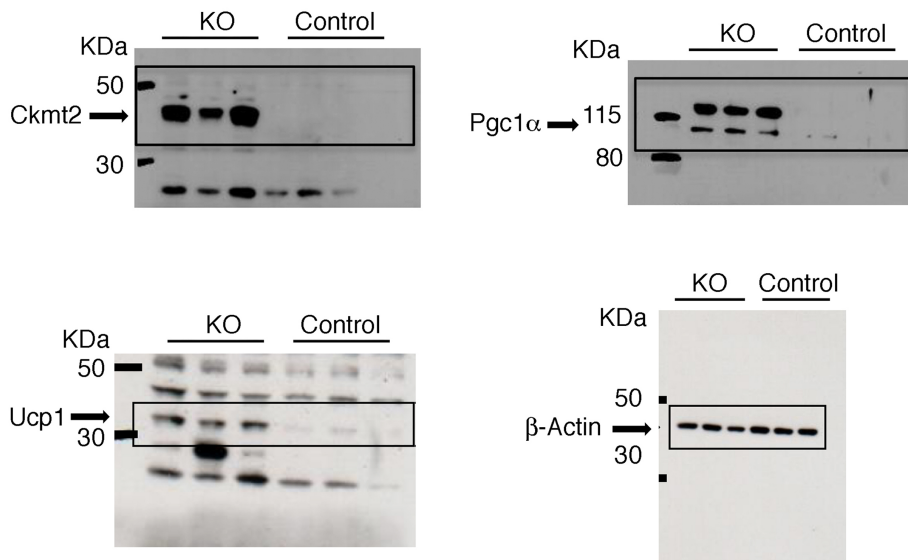

**Supplementary Figure 13.** Blots correspond to those shown in Figure 3d in the main manuscript.

Uncropped gels for Suppl. Fig. 2

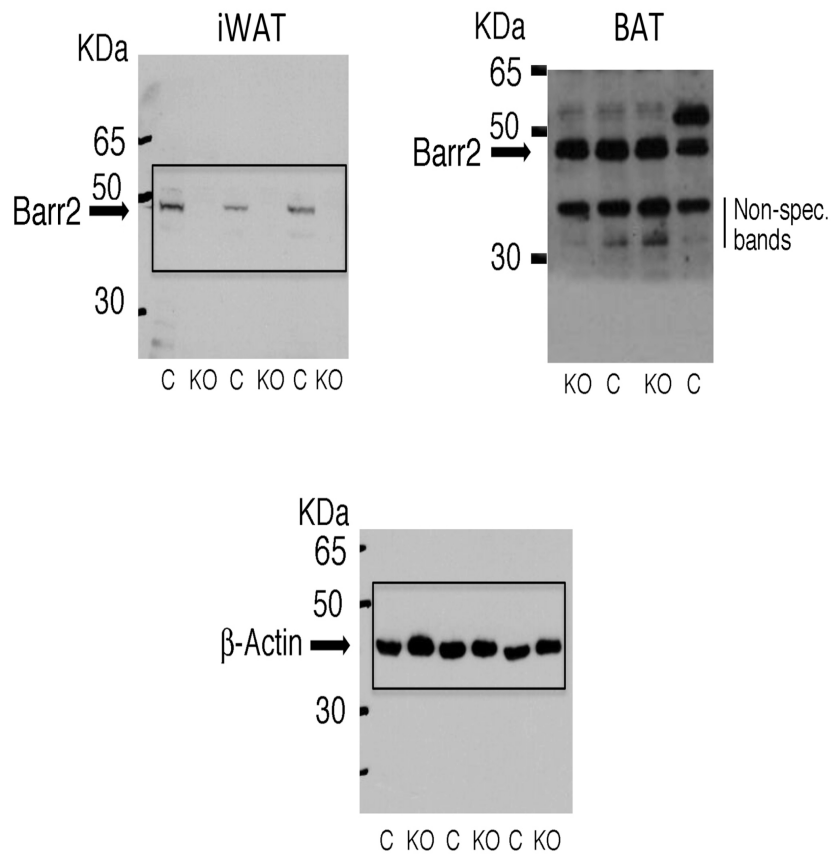

**Supplementary Figure 14.** Blots correspond to those shown in Supplementary Figure 2.

**Supplementary Table 1** Summary of metabolic and other parameters of lean and obese subjects from which fat samples were taken for gene expression studies

Obese and non-obese subjects were matched for sex, race, and age. None of the individuals received any medications.

---

|                          | <b>Lean</b> | <b>Obese</b> | <b>p-Value</b> |
|--------------------------|-------------|--------------|----------------|
| Sex (% female)           | 40%         | 40%          | 1              |
| Race (black:white)       | 3:7         | 3:7          | 1              |
| Age (years)              | 35.9±11.2   | 38.2±10.9    | 0.68           |
| BMI (kg/m <sup>2</sup> ) | 24.2±3.0    | 46.1±8.8     | <0.001         |
| Body fat (%)             | 23.1±9.8    | 46.3±6.6     | <0.001         |
| SI Index                 | 12.2±2.3    | 0.90±0.55    | <0.001         |

---

The SI index served as a measure of insulin sensitivity (see Methods for details).

Age, BMI, body fat (%), and SI index are given as means ± s.d. (n=8 per group). Statistical analyses were performed using two-tailed, unpaired t-tests.

**Supplementary Table 2** Antibodies, drugs, reagents, and commercial kits used in the present study

|                                                               | Source                            | Catalog #     |
|---------------------------------------------------------------|-----------------------------------|---------------|
| <b>Antibodies (dilution)</b>                                  |                                   |               |
| UCP1 (1:1000)                                                 | Abcam                             | ab10983       |
| PGC1 $\alpha$ (1:1000)                                        | Abcam                             | ab54481       |
| CKmt2 (1:1000)                                                | Abcam                             | ab55963       |
| Beta-arrestin-1/2 antibody (rabbit polyclonal) (1:1000)       | Provided by Dr. Vsevolod Gurevich | NA            |
| $\beta$ -Actin (1:1000)                                       | Cell Signaling                    | 4970S         |
| <b>Drugs, reagents and commercial kits</b>                    |                                   |               |
| CL 316,243                                                    | Sigma                             | Cat# C5976    |
| BCA protein assay kit                                         | Pierce                            | Cat# 23225    |
| Iodo(-)-Cyanopindolol, [ $^{125}$ I]                          | Perkin Elmer                      | NEX189100UC   |
| ECL Western blotting substrate                                | Pierce                            | 32106         |
| Bovine serum albumin (fatty acid-free)                        | Sigma-Aldrich                     | Cat# A7030    |
| Collagenase 1                                                 | Sigma-Aldrich                     | Cat# C0130    |
| Triton X-100                                                  | Fisher Scientific                 | Cat# BP151    |
| TWEEN 20                                                      | Fisher Scientific                 | Cat# BP337    |
| <i>QIAzol</i>                                                 | Qiagen                            | Cat# 79306    |
| Oligomycin                                                    | Sigma-Aldrich                     | Cat# 75351    |
| Antimycin A                                                   | Sigma-Aldrich                     | Cat# A8674    |
| FCCP                                                          | Sigma-Aldrich                     | Cat# C2920    |
| Isoproterenol hydrochloride                                   | Sigma-Aldrich                     | Cat# I6504    |
| Barbadin                                                      | Toronto Research Chemicals        | Cat# B118250  |
| Filipin                                                       | Sigma-Aldrich                     | Cat# F9765    |
| Dynasore hydrate                                              | Sigma-Aldrich                     | Cat# D7693    |
| ICI 118,551 hydrochloride                                     | Tocris                            | Cat# 0821     |
| CGP 20712 dihydrochloride                                     | Tocris                            | Cat# 1024     |
| Forskolin                                                     | Sigma-Aldrich                     | Cat# F3917    |
| RNase-free DNase I                                            | Qiagen                            | Cat# 79254    |
| Power SYBR Green PCR Master Mix                               | Applied Biosystems                | Cat# 4367659  |
| RNeasy mini kit                                               | Qiagen                            | Cat# 74104    |
| DNeasy Blood & Tissue Kits                                    | Qiagen                            | Cat# 69504    |
| SuperScript <sup>TM</sup> III First-Strand Synthesis SuperMix | Invitrogen                        | Cat# 18080400 |

|                                                                                        |                                   |                       |
|----------------------------------------------------------------------------------------|-----------------------------------|-----------------------|
| Complete EDTA-free protease inhibitor cocktail                                         | Sigma-Aldrich                     | Cat# 11873580001      |
| NuPAGE LDS sample buffer                                                               | Thermo Fisher Scientific          | Cat# NP0007           |
| <i>Barr2</i> siRNA pool (SMARTpool)                                                    | Dharmacon                         | Cat# M-041022-01-0005 |
| Lipofectamine RNAiMAX                                                                  | Thermo Fisher Scientific          | Cat# 13778030         |
| Lipofectamine 2000                                                                     | Thermo Fisher Scientific          | Cat# 11668027         |
| (±)-Propranolol hydrochloride                                                          | Sigma-Aldrich                     | Cat# P0884            |
| Seahorse XF <sup>c</sup> 96 FluxPak Mini                                               | Seahorse Bioscience               | Cat# 102601-100       |
| Ultra-Sensitive Mouse Insulin ELISA Kit                                                | Crystal Chem                      | Cat# 90080            |
| Norepinephrine ELISA Kit                                                               | <i>Rocky Mountain</i> Diagnostics | Cat# BA E-5200        |
| cAMP ELISA Kit                                                                         | Cayman Chemicals                  | Cat# 581001           |
| Mouse/Rat Leptin Quantikine ELISA Kit                                                  | R&D Systems                       | Cat# MOB00            |
| Bio-Plex Multiplex System                                                              | Bio-Rad                           |                       |
| Creatine Kinase Activity Assay Kit                                                     | Sigma-Aldrich                     | Cat# MAK116           |
| NEBNext <sup>®</sup> Ultra <sup>™</sup> RNA Library Prep Kit for Illumina <sup>®</sup> | New England Biolabs               | Cat# E7530S           |
| cAMP Dynamic 2 Kit                                                                     | Cisbio Bioassays                  | Cat# 62AM4PE          |

**Supplementary Table 3** PCR primers used for PCR/qRT-PCR experiments

## Mouse Primers

| Gene name                       | Forward (5'-3')                    | Reverse (5'-3')                       |
|---------------------------------|------------------------------------|---------------------------------------|
| <i>Ucp1</i>                     | ACTGCCACACCTCCAGTCATT              | CTTTCCTCACTCAGG ATTGG                 |
| <i>Pgc1<math>\alpha</math></i>  | AGCCGTGACCACTGACAAC GAG            | GCTGCATGGTTCTGAGTGCTAAG               |
| <i>Cd137</i>                    | CGTGCAGAACTCCTGTGATAAC             | GTCCACCTATGCTGGAGA AGG                |
| <i>Cidea</i>                    | TGCTCTTCTGTATCGCCCAGT              | GCCGTGTTAAGGAATCTG CTG                |
| <i>Tmem26</i>                   | ACCCTGTCATCC CACAGAG               | TGTTTGGTGGAGTCCT AAGGTC               |
| <i>Prdm16</i>                   | CAGCACGGTGAAGCCATTC                | GCGTGCATCCGCTT GTG                    |
| <i>Leptin</i>                   | CAAGCAGTGCCTATCCAGA                | AAGCCCAGGAATGAAGTCCA                  |
| <i>Barr1 (arrb1)</i>            | CCAAACCTTCCATGCTCAGT               | TAGCCGCACAGAGTTCCTTT                  |
| <i>Barr2 (arrb2)</i>            | AAGTCGAGCCCTAACTGCAA               | GGTGAGGGTCAACGAACACTT                 |
| <i><math>\beta</math>-actin</i> | GATATCGCCTGCGCTGGTCGTC             | ACGCAGCTCATTGTAGAAGGTGTGG             |
| <i>Ckmt1</i>                    | TGAGGAGACCTATGAGGTATTTGC           | TCATCAAAGTAGCCAGAACGGA                |
| <i>Ckmt2</i>                    | GCATGGTGGCTGGTGATGAG               | AAACTGCCCGTGAGTAATCTTG                |
| 18S rRNA                        | CGGCTACCACATCCAAGGAA               | GCTGGAATTACCGCGGCT                    |
| <i>Ap2</i>                      | CGCAGACGACAGGAAGGT                 | TCCATCCCCTTCTGCAC                     |
| <i>Epsti1</i>                   | ACCCTGATAGCACCAAACGA               | AGGTCTGCCAGTTCCTTGCTC                 |
| <i>Eva1</i>                     | CCACTTCTCCTGAGTTTACAGC             | GCATTTTAACCGAACATCTGTCC               |
| <i>Tbx1</i>                     | GGCAGGCAGACGAATGTTC                | TTGTCATCTACGGGCACAAAG                 |
| <i>Zic1</i>                     | AACCTCAAGATCCACAAAAGGA             | CCTCGAACTCGCACTTGAA                   |
| <i>Cpt1</i>                     | TTGCCCTACAGCTCTGGCATTTC            | GCACCCAGATGATTGGGATACTGT              |
| <i>Mead</i>                     | ATGACGGAGCAGCCAATGAT               | TCGTCACCCTTCTTCTCTGCTT                |
| <i>Cox<math>\beta</math>4</i>   | CTGCCCGGAGTCTGGTAATG               | CAGTCAACGTAGGGGGTTCATC                |
| <i>Cyt c</i>                    | AAATCTCCACGGTCTGTTCGG              | GGGTATCCTCTCCCAGGTG                   |
| <i>Acly</i>                     | ACCCTTTCCTGTTGATCACA               | GACAGGGATCAGGATTTCTTCTG               |
| <i>Fas</i>                      | GGAGGTGGTGATAGCCGGTAT              | TGGGTAATCCATAGAGCCCAG                 |
| <i>Gpt1</i>                     | AGCAAGTCTGCGCTATCAT                | CTCGTGTGGGTGATTGTGAC                  |
| <i>Acc</i>                      | CATCACCATCAGCCTGGTTACA             | ACTGTGTACGCTCTTCGGCAT                 |
| <i>Srebp1</i>                   | AGTGCCAAAGGAGGCACTAC               | CACCCTCTGGAAGACCACA                   |
| <i>Adiponectin</i>              | GCACTGGCAAGTTCTACTGCAA             | GTAGGTGAAGAGAACGGCCTTGT               |
| <i>Glut4</i>                    | GTGACTGGAACACTG GTCCTA             | CCAGCCAGTTGCATTGTAG                   |
| <i>Resistin</i>                 | CTGTCCAGTCTATCCTTGACAC             | CAGAAGGCACAGCAGTCTTGA                 |
| <i>Ppar-<math>\gamma</math></i> | GTGCCAGTTTCGATCCGTAGA              | GGCCAGCATCGTGTAGATGA                  |
| <i>Ppar-<math>\alpha</math></i> | GCGTACGGCAATGGCTTTAT               | GAACGGCTTCTCAGGTTCTT                  |
| <i>Barr2 f/f</i>                | ACTGACTTCTTCCCTCCTTAA<br>GCCCTTGCC | CAAGCCACCAGAGTTCCTCAAAGGT<br>GGGTGTCC |



|                            |                             |                              |
|----------------------------|-----------------------------|------------------------------|
| <i>Adipoq-Cre</i>          | TGGTGCATCTGAAGACACTAC       | TGCTGTTGGATGGTCTTCACAG       |
| <i>CoxII</i><br>mtDNA      | <u>GCCGACTAAATCAAGCAACA</u> | <u>CAATGGGCATAAAGCTATGG</u>  |
| <i>β-Globin</i><br>gDNA    | <u>GAAGCGATTCTAGGGAGCAG</u> | <u>GGAGCAGCGATTCTGAGTAGA</u> |
| <i>Prdm16<sup>ff</sup></i> | GAGCTAGGCAAGGACACTGCT       | CCAGTATCAGAGAGGCAAGAA        |

Human primers

| Gene name                        | Forward (5'-3')       | Reverse (5'-3')       |
|----------------------------------|-----------------------|-----------------------|
| <i>18S rRNA</i>                  | GCAATTATCCCCATGAACG   | GGCCTCACTAAACCATCCAA  |
| <i>BARR1</i><br>( <i>ARRB1</i> ) | TCAAGCACGAAGACACGAAC  | ATGCAAGATCTCCCAACAGG  |
| <i>BARR2</i><br>( <i>ARRB2</i> ) | CACGTCACCAACAACCTCCAC | TTGTTTCGAGTTGAGCCACAG |
